# Supplementary material for: Effects of Salinity-Stress on Seed Germination and Growth Physiology of Quinclorac-Resistant Echinochloa crus-galli (L.) Beauv
Source: MDPI journal article supplement (doi:10.3390/agronomy12051193), 2022-05-15
Supplement: s1 [file s1]

**Table S5.** The shoot length of seven *E. crus-galli* populations treated by salinity stress for 7 days.

| NaCl<br>concentration<br>(mM) | Shoot length<br>(cm) |      |      |      |      |      |      |      |      |      |      |      |      |      |      |      |      |      |      |      |      |  |
|-------------------------------|----------------------|------|------|------|------|------|------|------|------|------|------|------|------|------|------|------|------|------|------|------|------|--|
|                               | CH                   |      | QR   |      | HS   |      | SM   |      | HK   |      | DC   |      | QS   |      |      |      |      |      |      |      |      |  |
| 0                             | 6.30                 | 5.75 | 5.84 | 5.40 | 6.12 | 6.24 | 5.67 | 5.79 | 6.21 | 5.64 | 6.15 | 5.79 | 6.43 | 5.87 | 6.15 | 5.94 | 5.28 | 6.44 | 6.06 | 5.84 | 6.12 |  |
| 20                            | 5.64                 | 7.32 | 6.28 | 7.04 | 6.87 | 6.20 | 6.54 | 6.89 | 6.73 | 5.94 | 7.56 | 6.78 | 7.42 | 6.25 | 6.87 | 6.95 | 5.93 | 7.84 | 6.35 | 7.57 | 7.89 |  |
| 50                            | 3.76                 | 3.97 | 3.68 | 3.61 | 4.41 | 3.52 | 3.74 | 4.25 | 3.91 | 3.85 | 4.64 | 3.78 | 4.25 | 3.94 | 4.55 | 3.32 | 4.96 | 4.75 | 4.06 | 4.11 | 4.45 |  |
| 150                           | 1.25                 | 1.04 | 1.75 | 1.27 | 1.08 | 1.36 | 1.28 | 1.47 | 1.51 | 1.14 | 1.67 | 1.69 | 1.28 | 1.67 | 1.89 | 1.35 | 1.97 | 2.12 | 1.35 | 2.04 | 1.47 |  |
| 200                           | 0.12                 | 0.34 | 0.21 | 0.00 | 0.00 | 0.00 | 0.53 | 0.84 | 0.62 | 0.79 | 0.58 | 0.94 | 0.85 | 0.64 | 0.92 | 0.97 | 0.76 | 1.02 | 1.05 | 0.72 | 0.54 |  |

**Table S6.** The root length of seven *E. crus-galli* populations treated by salinity stress for 4 days.

[illegible]

**Table S7.** The root length of seven *E. crus-galli* populations treated by salinity stress for 7 days.

| NaCl<br>concentration<br>(mM) | Root length<br>(cm) |      |      |      |      |      |      |      |      |      |      |      |      |      |      |      |      |      |      |      |      |
|-------------------------------|---------------------|------|------|------|------|------|------|------|------|------|------|------|------|------|------|------|------|------|------|------|------|
|                               | CH                  |      |      | QR   |      |      | HS   |      |      | SM   |      |      | HK   |      |      | DC   |      |      | QS   |      |      |
| 0                             | 5.13                | 4.57 | 4.69 | 4.46 | 5.01 | 4.89 | 5.20 | 4.39 | 4.57 | 4.36 | 5.24 | 4.51 | 5.02 | 4.87 | 4.64 | 5.14 | 4.39 | 4.87 | 4.56 | 5.24 | 4.57 |
| 20                            | 5.02                | 5.31 | 5.48 | 4.64 | 5.26 | 4.51 | 5.39 | 5.44 | 5.17 | 5.58 | 4.99 | 5.67 | 5.51 | 4.97 | 5.93 | 5.94 | 5.28 | 5.47 | 5.64 | 4.38 | 5.27 |
| 50                            | 2.75                | 2.92 | 3.38 | 2.15 | 2.74 | 2.48 | 3.24 | 3.07 | 3.29 | 2.65 | 3.74 | 3.52 | 3.04 | 3.75 | 3.41 | 3.56 | 3.08 | 3.92 | 2.68 | 3.01 | 3.41 |
| 150                           | 1.26                | 1.57 | 1.09 | 1.23 | 0.87 | 1.01 | 1.22 | 1.46 | 1.45 | 1.28 | 1.56 | 1.42 | 1.57 | 1.19 | 1.67 | 1.55 | 1.33 | 1.89 | 1.54 | 1.32 | 1.24 |
| 200                           | 0.17                | 0.39 | 0.21 | 0.00 | 0.00 | 0.00 | 0.29 | 0.41 | 0.22 | 0.42 | 0.30 | 0.27 | 0.22 | 0.48 | 0.42 | 0.41 | 0.35 | 0.52 | 0.74 | 0.32 | 0.47 |

**Table S8.** The fresh weight of seven *E. crus-galli* populations treated by salinity stress for 7 days.

| NaCl<br>concentration<br>(mM) | Fresh weight<br>(g) |      |      |      |      |      |      |      |      |      |      |      |      |      |      |      |      |      |      |      |      |
|-------------------------------|---------------------|------|------|------|------|------|------|------|------|------|------|------|------|------|------|------|------|------|------|------|------|
|                               | CH                  |      |      | QR   |      |      | HS   |      |      | SM   |      |      | HK   |      |      | DC   |      |      | QS   |      |      |
| 0                             | 4.32                | 3.01 | 3.74 | 1.45 | 1.28 | 1.37 | 3.75 | 4.02 | 3.49 | 3.71 | 3.57 | 3.69 | 3.49 | 3.67 | 3.71 | 3.78 | 3.59 | 4.14 | 1.52 | 1.19 | 1.28 |
| 20                            | 2.36                | 3.87 | 3.74 | 1.04 | 1.24 | 1.31 | 2.74 | 3.85 | 3.57 | 3.95 | 3.17 | 3.28 | 3.74 | 2.97 | 3.98 | 4.12 | 3.34 | 3.67 | 1.34 | 1.42 | 1.07 |
| 50                            | 2.54                | 1.67 | 2.53 | 0.87 | 0.69 | 0.75 | 2.81 | 2.23 | 1.97 | 2.08 | 3.21 | 2.19 | 2.21 | 2.92 | 2.5  | 2.04 | 2.67 | 3.12 | 0.78 | 0.87 | 0.91 |
| 150                           | 1.32                | 0.98 | 0.78 | 0.09 | 0.17 | 0.12 | 1.3  | 0.85 | 1.46 | 2.1  | 0.89 | 1.15 | 1.47 | 1.25 | 1.39 | 1.2  | 1.78 | 1.23 | 0.5  | 0.24 | 0.35 |
| 200                           | 0.24                | 0.19 | 0.11 | 0    | 0    | 0    | 0.24 | 0.19 | 0.18 | 0.23 | 0.41 | 0.19 | 0.3  | 0.41 | 0.27 | 0.34 | 0.25 | 0.57 | 0.12 | 0.09 | 0.13 |

**Table S9.** The GST activity of *E. crus-galli* under 50mM NaCl treatment at different times.

| Days | Fresh weight<br>(g) |       |       |       |       |       |       |       |       |       |       |       |       |       |       |       |       |       |       |       |       |  |  |  |    |  |  |
|------|---------------------|-------|-------|-------|-------|-------|-------|-------|-------|-------|-------|-------|-------|-------|-------|-------|-------|-------|-------|-------|-------|--|--|--|----|--|--|
|      | CH                  |       |       |       | QR    |       |       |       | HS    |       |       |       | SM    |       |       |       | HK    |       |       |       | DC    |  |  |  | QS |  |  |
| 0    | 127.1               | 135.0 | 140.8 | 139.0 | 149.5 | 163.5 | 157.4 | 165.2 | 165.2 | 177.6 | 167.5 | 176.3 | 195.4 | 184.2 | 195.0 | 256.1 | 267.7 | 224.0 | 269.2 | 291.9 | 294.0 |  |  |  |    |  |  |
| 1    | 156.5               | 163.2 | 165.3 | 166.8 | 160.4 | 171.8 | 172.6 | 175.8 | 207.8 | 195.5 | 212.2 | 198.3 | 211.3 | 211.3 | 225.4 | 281.9 | 281.1 | 285.8 | 331.4 | 336.4 | 332.9 |  |  |  |    |  |  |
| 3    | 248.9               | 241.8 | 215.8 | 240.5 | 248.8 | 260.2 | 253.7 | 264.8 | 262.4 | 291.0 | 270.3 | 295.0 | 304.3 | 318.0 | 299.2 | 344.0 | 347.7 | 311.1 | 375.3 | 360.1 | 388.4 |  |  |  |    |  |  |
| 5    | 184.6               | 172.4 | 170.8 | 174.4 | 197.4 | 195.0 | 184.5 | 204.9 | 207.5 | 221.2 | 203.7 | 215.6 | 225.4 | 280.2 | 229.5 | 257.0 | 284.2 | 318.4 | 331.1 | 338.0 | 319.9 |  |  |  |    |  |  |
| 7    | 109.0               | 130.4 | 147.5 | 134.3 | 128.1 | 136.6 | 158.8 | 143.5 | 137.6 | 167.9 | 156.3 | 169.6 | 182.7 | 202.7 | 197.1 | 218.1 | 223.4 | 221.6 | 319.9 | 281.6 | 307.7 |  |  |  |    |  |  |
| 14   | 143.6               | 129.7 | 131.0 | 132.0 | 157.8 | 131.1 | 131.1 | 142.3 | 141.5 | 178.0 | 169.9 | 164.3 | 181.2 | 192.7 | 190.8 | 196.9 | 207.6 | 235.2 | 264.1 | 275.7 | 294.6 |  |  |  |    |  |  |

**Table S11.** The Gene Ontology (GO) analysis of the DEGs between QR and QS *E. crus-galli* populations without NaCl. GO analysis was performed at level 2 for the three main categories.

| Ontology           | Term_name                        | Up_Count | Up_Percent | Down_Count | Down_Percent |
|--------------------|----------------------------------|----------|------------|------------|--------------|
| cellular_component | extracellular region             | 33       | 10.12      | 21         | 9.68         |
| cellular_component | cell                             | 0        | 0          | 3          | 1.38         |
| cellular_component | nucleoid                         | 3        | 0.92       | 1          | 0.46         |
| cellular_component | membrane                         | 77       | 23.62      | 25         | 11.52        |
| cellular_component | cell junction                    | 9        | 2.76       | 10         | 4.61         |
| cellular_component | membrane-enclosed lumen          | 5        | 1.53       | 7          | 3.23         |
| cellular_component | macromolecular complex           | 37       | 11.35      | 4          | 1.84         |
| cellular_component | organelle                        | 131      | 40.18      | 62         | 28.57        |
| cellular_component | extracellular region part        | 6        | 1.84       | 0          | 0            |
| cellular_component | organelle part                   | 82       | 25.15      | 30         | 13.82        |
| cellular_component | membrane part                    | 65       | 19.94      | 30         | 13.82        |
| cellular_component | cell part                        | 205      | 62.88      | 96         | 44.24        |
| cellular_component | supramolecular complex           | 2        | 0.61       | 1          | 0.46         |
| biological_process | cell killing                     | 0        | 0          | 1          | 0.46         |
| biological_process | immune system process            | 4        | 1.23       | 4          | 1.84         |
| biological_process | metabolic process                | 134      | 41.1       | 82         | 37.79        |
| biological_process | cell proliferation               | 1        | 0.31       | 0          | 0            |
| biological_process | cellular process                 | 164      | 50.31      | 81         | 37.33        |
| biological_process | reproductive process             | 7        | 2.15       | 5          | 2.3          |
| biological_process | multicellular organismal process | 13       | 3.99       | 4          | 1.84         |
| biological_process | developmental process            | 20       | 6.13       | 8          | 3.69         |
| biological_process | growth                           | 2        | 0.61       | 0          | 0            |
| biological_process | rhythmic process                 | 4        | 1.23       | 0          | 0            |

|                    |                                               |     |       |     |       |
|--------------------|-----------------------------------------------|-----|-------|-----|-------|
| biological_process | response to stimulus                          | 51  | 15.64 | 46  | 21.2  |
| biological_process | localization                                  | 34  | 10.43 | 14  | 6.45  |
| biological_process | multi-organism process                        | 16  | 4.91  | 11  | 5.07  |
| biological_process | biological regulation                         | 51  | 15.64 | 33  | 15.21 |
| biological_process | cellular component organization or biogenesis | 48  | 14.72 | 9   | 4.15  |
| biological_process | detoxification                                | 2   | 0.61  | 0   | 0     |
| molecular_function | catalytic activity                            | 116 | 35.58 | 102 | 47    |
| molecular_function | signal transducer activity                    | 1   | 0.31  | 5   | 2.3   |
| molecular_function | structural molecule activity                  | 22  | 6.75  | 0   | 0     |
| molecular_function | transporter activity                          | 25  | 7.67  | 11  | 5.07  |
| molecular_function | binding                                       | 125 | 38.34 | 101 | 46.54 |
| molecular_function | antioxidant activity                          | 6   | 1.84  | 3   | 1.38  |
| molecular_function | nutrient reservoir activity                   | 1   | 0.31  | 1   | 0.46  |
| molecular_function | molecular transducer activity                 | 0   | 0     | 1   | 0.46  |
| molecular_function | molecular function regulator                  | 4   | 1.23  | 6   | 2.76  |
| molecular_function | molecular carrier activity                    | 4   | 1.23  | 0   | 0     |
| molecular_function | transcription regulator activity              | 13  | 3.99  | 5   | 2.3   |

---

**Table S12.** The Gene Ontology (GO) analysis of the DEGs between QR and QS *E. crus-galli* populations treated with 50 mM NaCl. GO analysis was performed at level 2 for the three main categories.

| Ontology           | Term_name                 | Up_Count | Up_Percent | Down_Count | Down_Percent |
|--------------------|---------------------------|----------|------------|------------|--------------|
| cellular_component | extracellular region      | 70       | 5.19       | 63         | 7.49         |
| cellular_component | cell                      | 3        | 0.22       | 2          | 0.24         |
| cellular_component | nucleoid                  | 2        | 0.15       | 1          | 0.12         |
| cellular_component | membrane                  | 177      | 13.11      | 238        | 28.3         |
| cellular_component | cell junction             | 26       | 1.93       | 39         | 4.64         |
| cellular_component | membrane-enclosed lumen   | 11       | 0.81       | 4          | 0.48         |
| cellular_component | macromolecular complex    | 64       | 4.74       | 45         | 5.35         |
| cellular_component | organelle                 | 332      | 24.59      | 269        | 31.99        |
| cellular_component | extracellular region part | 5        | 0.37       | 9          | 1.07         |
| cellular_component | organelle part            | 190      | 14.07      | 160        | 19.02        |
| cellular_component | membrane part             | 181      | 13.41      | 241        | 28.66        |
| cellular_component | cell part                 | 593      | 43.93      | 479        | 56.96        |
| cellular_component | supramolecular complex    | 1        | 0.07       | 13         | 1.55         |
| biological_process | reproduction              | 1        | 0.07       | 0          | 0            |
| biological_process | cell killing              | 3        | 0.22       | 0          | 0            |
| biological_process | immune system process     | 9        | 0.67       | 15         | 1.78         |
| biological_process | behavior                  | 0        | 0          | 1          | 0.12         |
| biological_process | metabolic process         | 525      | 38.89      | 347        | 41.26        |
| biological_process | cell proliferation        | 1        | 0.07       | 0          | 0            |
| biological_process | cellular process          | 467      | 34.59      | 359        | 42.69        |
| biological_process | nitrogen utilization      | 0        | 0          | 1          | 0.12         |
| biological_process | reproductive process      | 38       | 2.81       | 42         | 4.99         |
| biological_process | signaling                 | 1        | 0.07       | 1          | 0.12         |



|                    |                                               |      |        |      |        |
|--------------------|-----------------------------------------------|------|--------|------|--------|
| biological_process | multicellular organismal process              | 45   | 3.33   | 48   | 5.71   |
| biological_process | developmental process                         | 68   | 5.04   | 81   | 9.63   |
| biological_process | growth                                        | 5    | 0.37   | 21   | 2.5    |
| biological_process | locomotion                                    | 0    | 0      | 3    | 0.36   |
| biological_process | rhythmic process                              | 3    | 0.22   | 6    | 0.71   |
| biological_process | response to stimulus                          | 255  | 18.89  | 170  | 20.21  |
| biological_process | localization                                  | 69   | 5.11   | 83   | 9.87   |
| biological_process | multi-organism process                        | 49   | 3.63   | 37   | 4.4    |
| biological_process | biological regulation                         | 207  | 15.33  | 169  | 20.1   |
| biological_process | cellular component organization or biogenesis | 44   | 3.26   | 82   | 9.75   |
| biological_process | detoxification                                | 7    | 0.52   | 2    | 0.24   |
| molecular_function | catalytic activity                            | 534  | 39.56  | 369  | 43.88  |
| molecular_function | signal transducer activity                    | 5    | 0.37   | 18   | 2.14   |
| molecular_function | structural molecule activity                  | 14   | 1.04   | 3    | 0.36   |
| molecular_function | transporter activity                          | 65   | 4.81   | 62   | 7.37   |
| molecular_function | binding                                       | 461  | 34.15  | 339  | 40.31  |
| molecular_function | antioxidant activity                          | 15   | 1.11   | 13   | 1.55   |
| molecular_function | nutrient reservoir activity                   | 10   | 0.74   | 2    | 0.24   |
| molecular_function | molecular transducer activity                 | 2    | 0.15   | 17   | 2.02   |
| molecular_function | toxin activity                                | 2    | 0.15   | 0    | 0      |
| molecular_function | molecular function regulator                  | 29   | 2.15   | 9    | 1.07   |
| molecular_function | molecular carrier activity                    | 3    | 0.22   | 0    | 0      |
| molecular_function | transcription regulator activity              | 72   | 5.33   | 26   | 3.09   |
|                    |                                               | 4664 | 345.46 | 3889 | 462.46 |
